## RESEARCH ARTICLE

# Continuous arterial $P_{O_2}$ profiles in unrestrained, undisturbed aquatic turtles during routine behaviors

Cassandra L. Williams<sup>1,2,\*</sup> and James W. Hicks<sup>1</sup>

## ABSTRACT

Mammals and birds maintain high arterial partial pressure of oxygen ( $P_{O_2}$ ) values in order to preserve near-complete hemoglobin (Hb) oxygen ( $O_2$ ) saturation. In diving mammals and birds, arterial  $O_2$  follows a primarily monotonic decline and then recovers quickly after dives. In laboratory studies of submerged freshwater turtles, arterial  $O_2$  depletion typically follows a similar pattern. However, in these studies, turtles were disturbed, frequently tethered to external equipment and confined either to small tanks or breathing holes. Aquatic turtles can alter cardiac shunting patterns, which will affect arterial  $P_{O_2}$  values. Consequently, little is known about arterial  $O_2$  regulation and use in undisturbed turtles. We conducted the first study to continuously measure arterial  $P_{O_2}$  using implanted microelectrodes and a backpack logger in undisturbed red-eared sliders during routine activities. Arterial  $P_{O_2}$  profiles during submergences varied dramatically, with no consistent patterns. Arterial  $P_{O_2}$  was also lower than previously reported during all activities, with values rarely above 50 mmHg (85% Hb saturation). There was no difference in mean  $P_{O_2}$  between five different activities: submerged resting, swimming, basking, resting at the surface and when a person was present. These results suggest significant cardiac shunting occurs during routine activities as well as submergences. However, the lack of relationship between  $P_{O_2}$  and any activity suggests that cardiac shunts are not regulated to maintain high arterial  $P_{O_2}$  values. These data support the idea that cardiac shunting is the passive by-product of regulation of vascular resistances by the autonomic nervous system.

**KEY WORDS:** Turtle, Arterial  $P_{O_2}$ , *Trachemys scripta*, Cardiac shunt, Blood oxygen depletion, Diving

## INTRODUCTION

Across air-breathing vertebrates, there is long-standing acceptance that oxygen ( $O_2$ ) levels are regulated to meet metabolic demands and arterial values are kept high during almost all activities. Mammals and birds maintain a narrow range of arterial partial pressure of oxygen ( $P_{O_2}$ ) values in order to preserve near-complete hemoglobin (Hb) oxygen saturation over a wide range of metabolic demands (i.e. from rest to vigorous activity). As arterial blood gases are tightly coupled with lung gases, arterial  $P_{O_2}$  values are typically near 100 mmHg and, during activity, maintained by appropriate

adjustments in pulmonary ventilation. High Hb saturation and regulation of  $P_{O_2}$  to meet metabolic demands is believed to be true in reptiles as well. However, this has not been experimentally established. Aquatic turtles, with their low metabolic demands, hypoxemia tolerance and cardiac shunting capacity, may not have the same  $O_2$  regulatory requirements as mammals and birds.

In terrestrial mammals working at the maximum rate of  $O_2$  uptake ( $\dot{V}_{O_{2,max}}$ ), high arterial  $P_{O_2}$  values are still maintained and hypoxemia rarely occurs even during heavy exercise in steady state (Dempsey et al., 1984; Taylor et al., 1987). In contrast, a decrease in  $O_2$  is inevitable during diving. The duration of dives in marine mammals and birds is primarily a function of the magnitude of  $O_2$  stores, the rate these stores are depleted and the tolerance the divers have to low  $O_2$  (Butler and Jones, 1997; Kooyman and Ponganis, 1998). Because very low arterial  $P_{O_2}$  values are required for all  $O_2$  molecules to dissociate from Hb, extreme hypoxemic tolerance allows for more complete use of the blood  $O_2$  store during dives. Diving seals and penguins that allow arterial  $P_{O_2}$  values to fall below 30 mmHg on a regular basis use a much larger portion of the blood  $O_2$  store than can be accessed by other, less hypoxemic-tolerant animals (Meir et al., 2009; Ponganis et al., 2011, 2009). However, these marine animals maintain high arterial  $P_{O_2}$  values prior to hypoxic events (diving) and  $O_2$  levels are quickly restored after a dive (Kooyman et al., 1980; Meir et al., 2009; Ponganis et al., 2009; Qvist et al., 1986). Typical arterial  $O_2$  depletion patterns in seals and penguins are characterized by an initial increase in  $P_{O_2}$ , followed by a slow, steady and monotonic decline until the ascent, when the depletion rate tends to increase (Meir et al., 2009; Ponganis et al., 2011, 2009, 2007).

Many freshwater turtles are extremely hypoxemic tolerant, surviving for long periods under hypoxic or anoxic conditions. Unlike mammals and birds, there is no tight coupling of lung and arterial blood gases in reptiles because of the incomplete separation of the pulmonary and systemic circulations, and arterial blood gases can be altered by changes in either ventilation or cardiac shunting patterns. Shunting can occur from differences in pulmonary and systemic vascular resistance (Hicks, 1994; Hicks and Comeau, 1994; Hicks and Wang, 1998; Wang and Hicks, 1996b). In right to left (R–L) shunts, which increase during apneas, oxygen-depleted blood bypasses the pulmonary circulation and returns to the systemic circulation. Increases or decreases in the degree of R–L shunting will immediately alter admixture and, thus, arterial  $P_{O_2}$  can change rapidly despite stable ventilation (Hicks and Wang, 1996; Wang et al., 1997; Wang and Hicks, 1996b). However, in past laboratory studies, most blood  $O_2$  depletion patterns of submerged freshwater turtles (e.g. *Trachemys scripta*, *Chelodina longicollis*) are similar to those of diving mammals and birds, in which  $P_{O_2}$  starts high, depletes throughout a dive and then recovers upon surfacing. Some variation on this pattern has been observed, including positive and negative oscillations in arterial  $P_{O_2}$  values within dives (Burggren and Shelton, 1979; Burggren et al., 1989). Past studies

<sup>1</sup>Department of Ecology and Evolutionary Biology, School of Biological Science, University of California Irvine, Irvine, CA 92697, USA. <sup>2</sup>Center for Marine Biotechnology and Biomedicine, Scripps Institution of Oceanography, University of California San Diego, La Jolla, CA 92093-0204, USA.

\*Author for correspondence (cassondrawilliams@sandiego.edu)

 C.L.W., 0000-0002-3977-2900

**List of symbols and abbreviations**

|                                    |                                    |
|------------------------------------|------------------------------------|
| Hb                                 | hemoglobin                         |
| L–R                                | left to right                      |
| O <sub>2</sub>                     | oxygen                             |
| $P_{\text{CO}_2}$                  | partial pressure of carbon dioxide |
| $P_{\text{O}_2}$                   | partial pressure of oxygen         |
| R–L                                | right to left                      |
| TDR                                | time-depth recorder                |
| $\dot{V}_{\text{O}_2, \text{max}}$ | maximal oxygen consumption         |

investigating arterial O<sub>2</sub> levels have been on anesthetized turtles (Crossley et al., 1998; Hicks and Wang, 1999; Platzack and Hicks, 2001) or turtles in small, shallow tanks with a restricted (7–10 cm diameter) breathing hole and tethered to leads or catheters for serial or continuous blood sampling (Burggren and Shelton, 1979; Burggren et al., 1989; Wang and Hicks, 1996a, 2008; White et al., 1989). These experiments do not closely replicate natural behavior and disturbances may affect both behavioral and physiological responses in reptiles (Gaunt and Gans, 1969).

R–L shunts are reduced or even reversed during ventilation (Burggren and Shelton, 1979; Shelton and Burggren, 1976; Wang and Hicks, 1996a; White et al., 1989; White and Ross, 1966). If this change in R–L shunting patterns holds true in undisturbed turtles, when turtles are at the surface or out of the water arterial  $P_{\text{O}_2}$  should more closely reflect lung  $P_{\text{O}_2}$ , similar to mammals and birds. Although numerous laboratory studies have investigated the physiological adaptations underlying freshwater turtles' tolerance to low O<sub>2</sub> environments, few studies have investigated O<sub>2</sub> use in turtles during non-submerged routine activities. As a result, patterns of arterial O<sub>2</sub> use in minimally disturbed turtles, whether submerged or at the surface, are completely unknown.

We undertook to make the first continuous arterial  $P_{\text{O}_2}$  measurements in undisturbed, untethered red-eared sliders [*Trachemys scripta elegans* (Weid 1839)] free to dive or not dive in large tanks over an extended period. Our goals were to measure arterial  $P_{\text{O}_2}$  using implanted microelectrodes (tip diameter=0.5 mm) and a waterproof backpack logger during different activities, including resting submergences, swimming, basking, resting at the surface and when a person was present. We predicted that when turtles were at the surface or out of the water, arterial  $P_{\text{O}_2}$  values will vary but will be significantly higher than during submergences. With their anoxia tolerance and capacity to R–L shunt, we also predicted that  $P_{\text{O}_2}$  during submergences would vary more than observed in marine mammals and birds, but the final  $P_{\text{O}_2}$  would be negatively related to duration of submergences, particularly after long submergences.

**MATERIALS AND METHODS****Animals and instrumentation**

Six adult female red-eared sliders (1546±145 g) were collected in northeastern Texas and shipped to the University of California Irvine, where they were housed in a room maintained at 25°C with a 12 h:12 h light:dark cycle. Turtles were kept in 800 litre (76×180×66 cm) fiberglass tanks two-thirds filled with 25°C water. Water was continuously filtered and temperature was maintained by an in-line heater with a thermostat. Turtles could freely swim, rest at the bottom or at the surface hanging onto platform ramps, or bask on a platform (76×60 cm) heated by an overhead heat lamp. The surface of the large tank was never covered so turtles always had unrestricted access to the surface during the experimental period. Turtles were fed turtle pellets (Tetra ReptoMin

Floating Food Sticks, Spectrum Brands, Blacksburg, VA, USA), carrots and lettuce twice a week.

**Surgery**

After an acclimation period of at least 4 weeks, turtles underwent surgery to implant  $P_{\text{O}_2}$  electrodes (Licox, C1.1 Revoxide; Integra Life Sciences, Plainsboro, NJ, USA). Prior to implantation,  $P_{\text{O}_2}$  electrodes were pretreated with TDMAC heparin complex (Polysciences, Washington, PA, USA). Turtles were anesthetized by placing them in a sealed container with gauze soaked in isoflurane and then intubated with an endotracheal tube. Turtles were ventilated using an artificial ventilator (SAR-830; CWE, Ardmore, PA, USA) with integrated isoflurane vaporizer (Dräger, Lübeck, FRG) at a rate of 8–15 breaths min<sup>-1</sup> (Wang and Hicks, 2008) with 4–5% isoflurane and room air. Isoflurane was reduced to 1–2% after turtles no longer responded to a pinch reflex test or corneal reflex test. Utilizing a sterile (betadyne) preparation, the right carotid artery was isolated and gently separated from the vagus nerve. The artery was cut and the  $P_{\text{O}_2}$  electrode was inserted and advanced 6 to 10 cm toward the heart. Post-experiment dissections confirmed  $P_{\text{O}_2}$  electrodes were in the common carotid or right aortic arch. The vessel was tied off and the incision closed with 3-0 silk. Surgical adhesive was also applied to the incision site (Vet-Bond, 3M, St Paul, MN, USA). The electrode was secured with additional sutures and the electrode cable was attached to the carapace with waterproof Tesa tape (Beiersdorf AG, Hamburg, Germany) and glue (Loctite 401, Henkel, Westlake, OH, USA). The  $P_{\text{O}_2}$  electrode was connected to a microprocessor logger (UUB/3-EPTb, UFI, Morro Bay, CA, USA) with a custom-made plastic waterproof housing (entire package: 6.3×3×2 cm, 99 g in air), which was then epoxied to the center of the carapace. The logger was programmed to record  $P_{\text{O}_2}$  data continuously at a frequency of 1 Hz. A time-depth recorder (TDR; DST-milli, Star-Oddi, Gardabaer, Iceland; 4×1.3 cm, 9 g in air; 5 g in water, 0.33 to 1 Hz sampling rate, resolution: ±0.6 cm, <0.1°C) was attached to the left anterior carapace and recorded turtle submergence behavior and ambient temperature. Turtles were returned to experimental tanks after overnight recovery from surgery. Visual observations confirmed that post-procedure turtles adjusted to the loggers such that they could easily swim, dive, rest on the bottom or float at the surface. All procedures were approved by the University of California Irvine Institutional Animal Care and Use Committee (no. 2011-2995).

**Data processing**

After experiments were completed, the  $P_{\text{O}_2}$  logger and TDR were removed and the data were downloaded. Collected logger data were converted to  $P_{\text{O}_2}$  as previously described (Knower Stockard et al., 2005) and then plotted in a graphics program (Origin 2015, OriginLab Corporation, Northampton, MA, USA). Continuous temperature profiles from the TDR demonstrated mean temperature was 25.4±0.8°C. No temperature correction was made to  $P_{\text{O}_2}$  values because external temperature, as measured on the carapace, varied very little during the experimental period, with >95% of measured temperature within two standard deviations of the mean (25.4°C).

 **$P_{\text{O}_2}$  electrodes**

To continuously measure arterial  $P_{\text{O}_2}$ , commercially available electrodes (Licox, C1.1 Revoxide; Integra Life Sciences, Plainsboro, NJ, USA) were used. The 90% response time to changes in  $P_{\text{O}_2}$  for these electrodes is 60 s (Meir et al., 2009; Knower Stockard et al., 2005).  $P_{\text{O}_2}$  electrodes were calibrated as

previously described except at 25°C (Knower Stockard et al., 2005). Although prior studies demonstrate no significant drift in these electrodes in mammals and birds (Meir et al., 2009; Knower Stockard et al., 2005), a post-experiment calibration was performed to assess drift in electrode output at 25°C.

After a 24-h recovery period, turtles were kept in tanks and left undisturbed except as noted. Investigator presence in the experimental room was minimized and each occurrence was documented. Turtle behavior was recorded continuously using a video surveillance system consisting of surveillance recording software (SecuritySpy, Ben Software, London, UK) and two network cameras (Panasonic BB-HCM511A & BLC140A, Panasonic, Osaka, Japan) placed above the tank. Video observations were recorded through a computer (Mac Mini, Apple, Cupertino, CA, USA) and stored on external hard drives. Turtle behavior was assessed by reviewing video data and dividing behavior into five categories: (1) submerged or resting on the bottom of the tank; (2) stationary at the surface, often hanging onto a floating ramp; (3) on top of the basking platform; (4) swimming submerged or at the surface; and (5) when a person was present in the room. Instances in which a turtle was not in view were omitted from the behavioral analysis. Behavioral data for each turtle were confirmed by plotting video data with TDR data. Any conflicts between the two data sets were resolved by rechecking the video behavior and reconfirming the behavior with TDR data. Submergences were manually extracted from the submerged data using the combined TDR and behavior profiles. During submergences, turtles primarily rested on the bottom. Submergences with significant swimming were categorized as swimming and not included as submergences in the analysis.

### Statistics

Mean and range (maximum to minimum) of  $P_{O_2}$  values were obtained for each behavioral category during the 48-h period. Differences between mean  $P_{O_2}$  in each behavioral category were assessed with ANOVA and *post hoc* pairwise comparisons using Tukey's tests in Origin. Instances in which a behavior occurred for less than 15 min during the 48-h period were omitted. For each turtle, mean values were calculated for  $P_{O_2}$  parameters for all submergences in excess of 2 min, including mean, maximum, minimum, initial, and final  $P_{O_2}$ . The number of long (>20 min) and short (between 2 and 20 min) submergences, submergence duration and total change in  $P_{O_2}$  (from start of submergence to end) were also calculated. Differences between mean and initial  $P_{O_2}$  values during submergences were evaluated using a paired *t*-test in Origin. Statistics to assess the relationship between  $P_{O_2}$  characteristics (initial  $P_{O_2}$ , maximum  $P_{O_2}$ , final  $P_{O_2}$  and minimum  $P_{O_2}$ ) and submergence duration were run in R, version 3.2.3 (R Foundation for Statistical Computing, Vienna, Austria). Because of repeated sampling, analyses were done using linear mixed effects models (package: lme4; Bates et al., 2015) with individual turtles as random effects and submergence duration as the fixed effect. In light of the high variability between individual turtles, we ran both random intercept and random slope models. Model selection was based on AIC scores. Reported *P*-values were calculated using a likelihood ratio test of the full model and the null model for both random intercept models and random slope models. Marginal and conditional  $r^2$  values were calculated to determine goodness of fits using the methods previously described for random intercept models (Nakagawa and Schielzeth, 2013) and random slope models (Johnson, 2014) using the MuMIn package (<https://CRAN.R-project.org/package=MuMIn>). Model descriptions and results from

mixed effect model analyses are reported in Table S1. Model assumptions of homogeneity and normality were evaluated and confirmed by examination of residuals.  $P_{O_2}$  data are expressed as measured in mmHg (7.5 mmHg=1 kPa). Reported Hb saturation values were calculated from  $P_{O_2}$  data using the Hill equation [ $Y_{O_2} = (P_{O_2})^n / (P_{50})^n + (P_{O_2})^n$ ], a Hill coefficient (*n*) of 1.71 and a  $P_{50}$  value of 21 mmHg (Burggren et al., 1977). Arterial  $O_2$  content was calculated from the equation:  $Ca_{O_2} = (S_{a,O_2} \times Hb \times 1.36) + (0.0031 \times P_{O_2})$ , where  $S_{a,O_2}$  is arterial Hb saturation and Hb is assumed to be 8.0 g dl<sup>-1</sup> (O'Rourke and Jenkins, 2008). Means are expressed  $\pm$ s.d.

## RESULTS

### Arterial $P_{O_2}$ during different activities

Arterial  $P_{O_2}$  showed no consistent values or ranges during any of the five different activities (Fig. 1). Values for each activity ranged from 4 mmHg to above 99 mmHg with significant variation among individual turtles (Table 1). When turtles were at the surface or out of the water basking,  $P_{O_2}$  was often surprisingly low (Table 1, Fig. 1). Over the 48-h period,  $P_{O_2}$  values in five of the six turtles dropped below 20 mmHg while swimming, submerged or at the surface (Table 1, Fig. 1A). There was no difference in mean  $P_{O_2}$  between five different activities (one-way ANOVA,  $F=0.37$ ,  $P=0.82$ , d.f.=4; Fig. 2). Although this experiment focused on a 48-h period in which behavior was recorded, arterial  $P_{O_2}$  also varied over longer durations (Fig. 3).

### Submergences

$P_{O_2}$  and TDR submergence data were obtained from six turtles during 48-h periods (Table 2). A total of 529 submergences of 2 min or greater were analyzed. Of those, 168 were longer than 20 min and 46 went beyond 40 min. All turtles completed submergences longer than 20 min and five turtles had submergences over 40 min in duration. The longest submergence was just over 83 min by turtle 35 (Fig. 1C).

### Initial arterial $P_{O_2}$ values

Although there was a wide range in arterial  $P_{O_2}$  values, turtles did not start submergences with a high  $P_{O_2}$ . Only a few dives began with an arterial  $P_{O_2}$  above 60 mmHg (Fig. 4A). Initial  $P_{O_2}$  was not related to submergence duration ( $P>0.1$ ). Further, there was no significant difference between individual turtle means for initial  $P_{O_2}$  and mean  $P_{O_2}$  ( $t=0.20$ , d.f.=5,  $P=0.85$ ; Table 2). Initial  $P_{O_2}$  was rarely the highest  $P_{O_2}$  value during submergences (Table 2). In over half of all submergences longer than 20 min, maximum  $P_{O_2}$  occurred during the first 10% of the submergence (Fig. 4C). Despite this trend, there was no statistically significant relationship between maximum  $P_{O_2}$  and duration ( $P>0.5$ ; Table S1).

### Arterial $P_{O_2}$ depletion patterns

$P_{O_2}$  values during submergences did not follow a consistent pattern.  $P_{O_2}$  profiles varied among both short and long submergences: increasing, decreasing, increasing and decreasing, or changing very little (Figs 5 and 6). Final  $P_{O_2}$  was often higher than initial  $P_{O_2}$  (Table 2, Fig. 6). This occurred even in submergences longer than 20 min, where 64 of 168 submergences ended with a higher  $P_{O_2}$  than at the start of the submergence (Figs 5B,C and 7). Despite this high variability, there were some general trends in  $P_{O_2}$ . As described above, maximum  $P_{O_2}$  values often occurred near the beginning of submergences and  $P_{O_2}$  regularly dropped to minimum values during the final 10% of submergences (Fig. 4C).

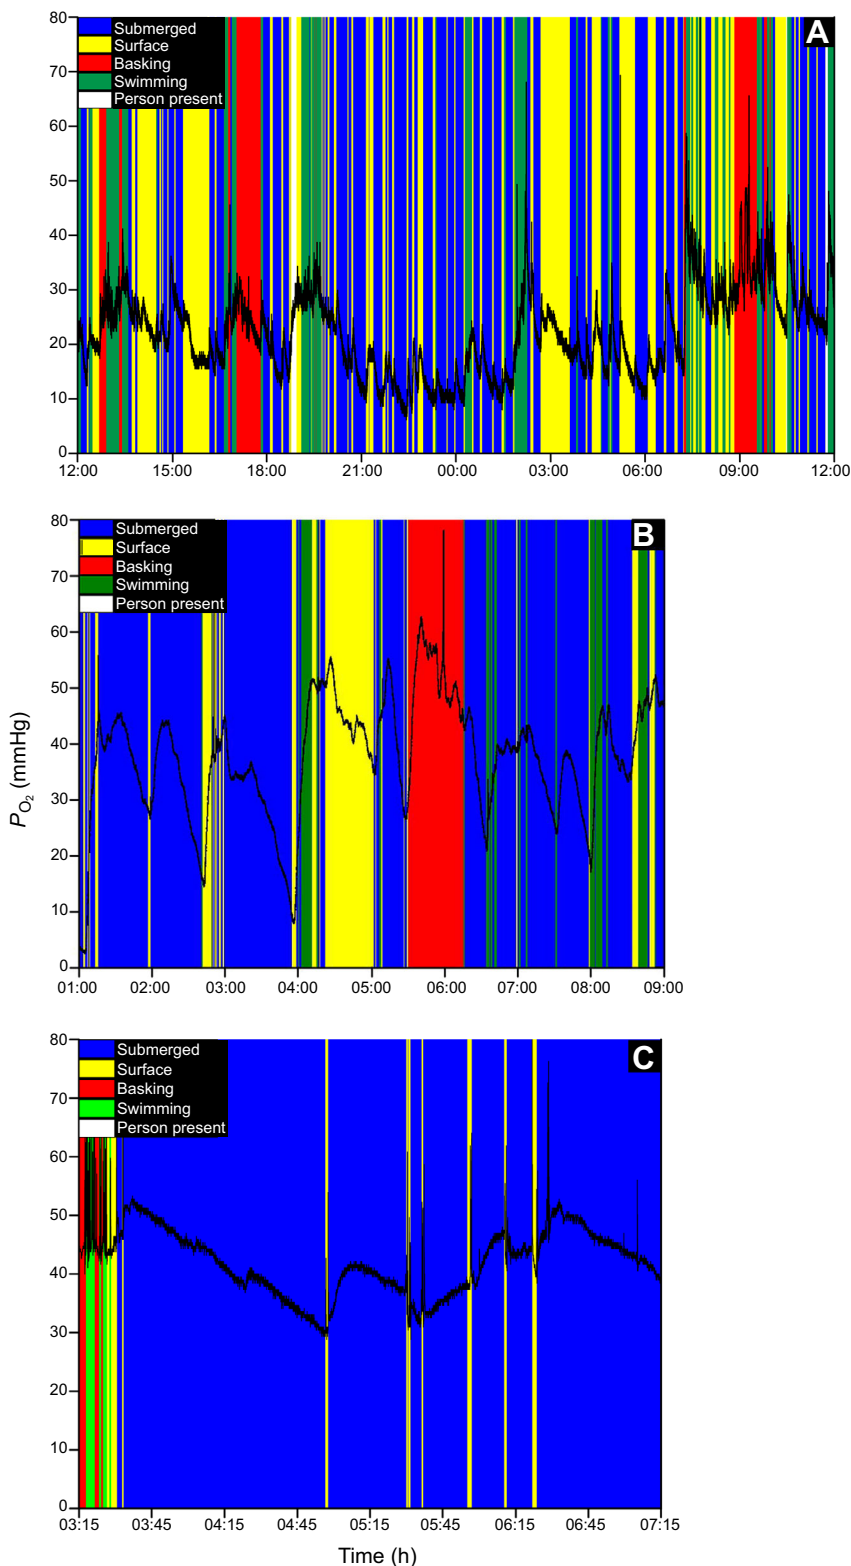

**Fig. 1. Continuous arterial  $P_{O_2}$  measurement during different activities in *Trachemys scripta*.** Data are for (A) 1 day in turtle 30 (12:00 h on 10 January 2015 to 12:00 h on 11 January 2015), (B) 8 h in turtle 32 (01:00 to 09:00 h on 26 November 2014) and (C) 4 h in turtle 35 (03:15 to 07:15 h on 18 January 2015). Each activity is represented by a different color and arterial  $P_{O_2}$  is represented by the black line. Note that the longest submergence (83 min) of the study is depicted in C.

### Final arterial $P_{O_2}$ values

Final  $P_{O_2}$  values also varied widely between submergences and turtles (Fig. 4B). Among individual turtles, mean final  $P_{O_2}$  ranged from 21 to 44 mmHg. Despite the number of submergences with a negative  $P_{O_2}$  change (Fig. 7), final  $P_{O_2}$  had a minor statistically significant relationship with submergence duration ( $X^2=4.55$ , marginal  $r^2=0.07$ ,  $P=0.03$ ; Fig. 4C, Table S1). The very strong effect of individual turtle

is illustrated by the high conditional  $r^2$  values (conditional  $r^2=0.6$ ; Table S1). Final  $P_{O_2}$  was rarely the minimum  $P_{O_2}$  value as  $P_{O_2}$  often increased at the end of dives when the turtle was ascending to the surface (Fig. 6). Minimum  $P_{O_2}$  occurred within the last 10% of the submergence (Fig. 4C) in over half of submergences longer than 20 min, and was also marginally related to submergence duration ( $X^2=27.3$ , marginal  $r^2=0.06$ ,  $P<0.001$ ; Table S1).



**Table 1.** Mean arterial  $P_{O_2}$  and range (lowest to highest values) for individual turtles during different activities over a 48-h period

| Turtle ID  | Submerged (mmHg) | Surface (mmHg) | Basking (mmHg) | Swimming (mmHg) | Person present (mmHg) |
|------------|------------------|----------------|----------------|-----------------|-----------------------|
| 26         | 39.3 (2–69)      | 30.7 (4–61)    | *              | 37.3 (2–69)     | 27.3 (4–69)           |
| 28         | 32.8 (15–66)     | 35.0 (17–65)   | 39.8 (24–83)   | 36.9 (17–88)    | 36.6 (27–61)          |
| 29         | 43.2 (9–78)      | 53.6 (10–77)   | 40.1 (12–74)   | 38.9 (7–71)     | 40.3 (12–57)          |
| 30         | 21.6 (6–53)      | 22.6 (7–69)    | 29.2 (15–66)   | 28.2 (8–86)     | 30.7 (20–51)          |
| 32         | 34.1 (3–65)      | 38.0 (3–65)    | 48.9 (28–78)   | 40.7 (11–57)    | 32.2 (11–51)          |
| 35         | 42.8 (25–92)     | 40.9 (22–99)   | 47.6 (27–105)  | 48.2 (28–105)   | 50.5 (35–104)         |
| Grand mean | 35.6±8.1         | 36.8±10.4      | 41.1±7.9       | 38.4±6.5        | 36.3±8.3              |

\*Duration of activity <15 min during the 48-h period.

**Arterial Hb saturation and  $O_2$  content**

Hb saturation values are estimated because not all determinants of the  $O_2$ –Hb dissociation curve were measured, e.g. pH and  $P_{CO_2}$ . Using these estimates, Hb saturation profiles of the periods shown in Fig. 1 and of the submergences shown in Figs 5 and 6 were made (Figs S1–S3). Estimates of arterial Hb saturation while turtles were at the surface or basking varied from 54% to 83%. Mean Hb saturation values and ranges during all activities were also estimated (Table S2). Hb saturation values were rarely above 85%. For submergences, estimated mean initial Hb saturation values ranged from 56% to 82% and final values were between 52% and 79%. Arterial  $O_2$  content, calculated from the mean arterial  $P_{O_2}$  in Table 2 and estimated Hb saturation values, ranged from 6.2 to 9.1 ml  $O_2$  100 ml<sup>−1</sup> at the beginning of dives and from 5.7 to 8.8 ml  $O_2$  100 ml<sup>−1</sup> at the end of dives.

**$P_{O_2}$  electrodes**

Although not all electrodes could be tested owing to breakage, a comparison of pre- and post-deployment calibrations at 25°C was conducted for the  $P_{O_2}$  electrode implanted in turtle 32. Arterial  $P_{O_2}$  profiles using both calibrations demonstrate no significant change in  $P_{O_2}$  values, even with several months between calibrations (Fig. S4). Although some minor drift occurred between the two calibrations, arterial  $P_{O_2}$  values changed less than 2 mmHg.

**DISCUSSION**

This first study to continuously measure arterial  $P_{O_2}$  in undisturbed and untethered aquatic turtles over days revealed that, unlike marine

mammals and birds, aquatic turtles do not tightly regulate arterial  $O_2$  levels. Although turtles were under identical conditions for days at a time with unfettered ability to move about the tanks, arterial  $P_{O_2}$  levels varied widely during the same activities. Contrary to predictions,  $P_{O_2}$  values remained low while turtles were at the surface or out of the water. In addition, there was no consistent arterial  $P_{O_2}$  pattern during submergences.

**Lack of tight  $O_2$  regulation during routine activities**

Individual differences over the 48-h period are apparent in all activities, including during both submergences and non-submerged activities (Table 1). Further, the variation in arterial  $P_{O_2}$  values during routine activities is even more evident when examining arterial  $P_{O_2}$  over a 1-week period (Fig. 3). The extremely variable arterial  $P_{O_2}$  values are in contrast to marine mammals and birds, which generally maintain high, stable arterial  $P_{O_2}$  values except when diving. We suggest that *T. scripta*, because of several chelonian attributes including cardiac shunting, low metabolism, high hypoxia tolerance and a large lung  $O_2$  store, do not need to maintain stable, high arterial  $P_{O_2}$  values or tightly regulate blood  $O_2$ .

**Cardiac shunting**

First, cardiac shunting may underlie these variable values. The ventricle of the three-chambered turtle heart is partially divided by a poorly developed muscular ridge into the cavum pulmonale and the cavum venosum/cavum arteriosum (Hicks and Wang, 2004). As a result of this anatomical feature, when pulmonary vascular resistance is elevated relative to the vascular resistance in the systemic circulation, a R–L shunt prevails (Hicks, 1994; Hicks and

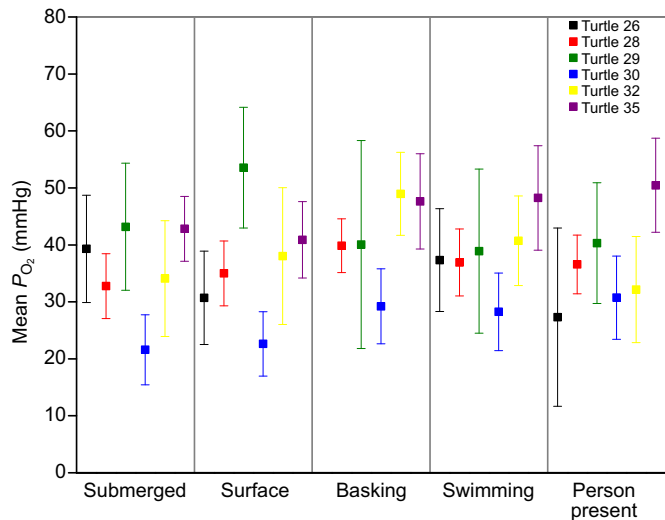

**Fig. 2.** Mean  $\pm$ s.d.  $P_{O_2}$  for individual turtles during each activity.  $N=6$  for all activities except basking ( $N=5$ ).

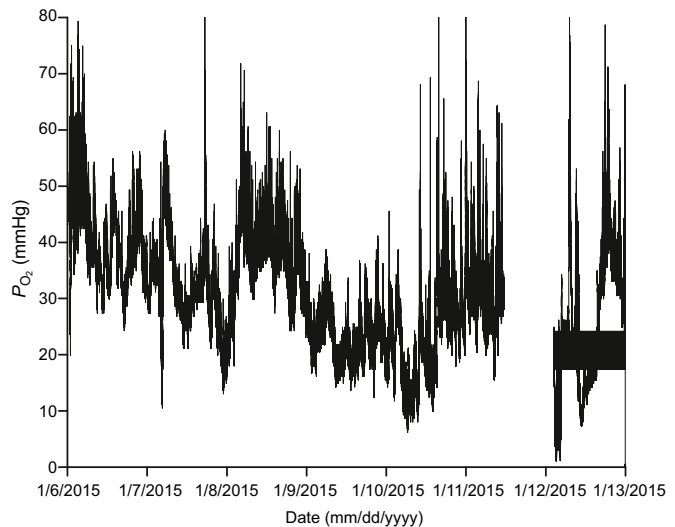

**Fig. 3.** One-week profile of continuous arterial  $P_{O_2}$  measurement in one turtle. Note that the range of arterial  $P_{O_2}$  changed over different days (e.g. 6–7 January, 25–55 mmHg versus 9–10 January, 10–40 mmHg).

**Table 2. Individual turtle mass, number, duration and mean, maximum, minimum, initial, final, mean and net change (from initial to final) arterial  $P_{O_2}$  for all submergences 2 min or longer in duration**

| Turtle ID  | Mass (mg) | <i>N</i> | <i>N</i> > 20 min | Duration (min)    | Maximum $P_{O_2}$ (mmHg) | Minimum $P_{O_2}$ (mmHg) | Initial $P_{O_2}$ (mmHg) | Final $P_{O_2}$ (mmHg) | Mean $P_{O_2}$ (mmHg) | $P_{O_2}$ change (mmHg) |
|------------|-----------|----------|-------------------|-------------------|--------------------------|--------------------------|--------------------------|------------------------|-----------------------|-------------------------|
| 26         | 1627      | 89       | 51                | 24.2±15<br>(2–63) | 46.7±11<br>(17–69)       | 33.0±11<br>(3–60)        | 37.1±11<br>(3–60)        | 37.8±11<br>(3–56)      | 38.2±10<br>(10–55)    | 0.8±8<br>(–)29–29)      |
| 28         | 1397      | 96       | 45                | 19.9±14<br>(2–61) | 45.3±7<br>(28–67)        | 29.1±6<br>(15–44)        | 35.3±6<br>(17–50)        | 32.6±6<br>(15–49)      | 34.0±55<br>(24–47)    | 2.7±8<br>(–)14–34)      |
| 29         | 1680      | 38       | 22                | 23.2±16<br>(2–52) | 49.4±12<br>(17–78)       | 34.2±11<br>(15–64)       | 39.9±12<br>(16–71)       | 39.4±11<br>(16–65)     | 41.4±11<br>(16–70)    | 0.5±8<br>(–)18–21)      |
| 32         | 1496      | 70       | 16                | 13.7±14<br>(2–56) | 43.0±9<br>(12–65)        | 29.5±12<br>(2–52)        | 37.1±10<br>(3–62)        | 32.9±12<br>(3–62)      | 36.0±9<br>(6–36)      | 4.1±13<br>(–)24–43)     |
| 30         | 1372      | 146      | 6                 | 11.0±5<br>(2–26)  | 27.4±7<br>(14–53)        | 19.3±6<br>(6–37)         | 23.3±6<br>(11–41)        | 20.8±6<br>(9–37)       | 22.3±6<br>(10–39)     | 2.5±3<br>(–)7–13)       |
| 35         | 1705      | 90       | 28                | 17.1±15<br>(2–83) | 64.0±15<br>(39–92)       | 37.6±5<br>(25–50)        | 48.9±8<br>(26–70)        | 43.9±7<br>(30–72)      | 43.0±5<br>(31–55)     | –1.1±8<br>(–)20–31)     |
| Grand mean | 1546±145  | 88±35    | 28±17             | 18.2±5            | 46.0±12                  | 30±6                     | 37±8                     | 35±8                   | 36±7                  | 1.6±1.9                 |

*N*, number of submergences. Mean±s.d. is given in the first row and range is shown in parentheses in the second row for duration and  $P_{O_2}$  parameters.

Comeau, 1994; Hicks and Wang, 1998; Wang and Hicks, 1996b). Under these conditions, systemic venous blood bypasses the pulmonary circulation and reenters the systemic circulation, resulting in overall lower arterial  $P_{O_2}$  values. In addition, the lower pulmonary blood flow reduces the transfer of  $O_2$  from the lungs to the pulmonary capillaries.

The highly variable and overall lower arterial  $P_{O_2}$  values in the present study are likely the result of increased cardiac shunting. Changes in the degree of R–L or L–R shunting would account for the variability in arterial  $P_{O_2}$  profiles within submergences (Wang and Hicks, 1996b). Although variation in cardiac shunting patterns has been observed in turtles during different behaviors (Krosniunas and Hicks, 2003), most past studies demonstrate that a R–L shunt prevails during apnea, while it is reduced or reversed during ventilation (Burggren and Shelton, 1979; Shelton and Burggren, 1976; Wang and Hicks, 1996a; White et al., 1989; White and Ross, 1966). The comprehensive nature of our study and less disturbed environment in which it was undertaken suggest additional changes in shunting patterns, producing less uniform gas exchange and resulting in highly variable and overall lower arterial  $P_{O_2}$ . Although studies demonstrating differences in degrees of cardiac shunting have focused on the biological significance of regulating shunting, no study has been able to establish a functional role. The lack of a relationship between arterial  $P_{O_2}$  values and specific activities suggest changes in levels of cardiac shunting are not predictable or related to specific turtle activities. Thus, although the increased changes in cardiac shunting patterns provides a mechanistic explanation of the observed low and variable values, the benefit, if any, of not maintaining high, stable arterial  $P_{O_2}$  remains unknown.

#### Low metabolism and high anoxia tolerance

Second, turtles are easily able to handle these low and inconsistent  $P_{O_2}$  values because of their naturally low metabolic rate and their high tolerance of low  $O_2$  conditions. Their low metabolic rate reduces demand for  $O_2$  and prolongs the time they can survive anoxic submergences (Warren et al., 2006). In addition to needing less  $O_2$ , freshwater turtles can endure submergences for weeks despite lactate levels as high as 90 to 200 mmol l<sup>–1</sup> (Warren and Jackson, 2008; Warren et al., 2006). *Trachemys scripta* can survive submerged in 3°C normoxic water for up to 180 days and in 22°C anoxic water for over 20 h (Belkin, 1968; Warren et al., 2006). Freshwater turtles handle elevated lactate levels with no difficulty because of their high buffering capacity, including uptake of lactate in the shell and skeleton (Warren and Jackson, 2008). For example,

despite a fall in arterial Hb saturation from 91% to 34% and a sixfold increase in blood lactate after vigorous activity, pH in red-eared sliders was only slightly lower, from a pH of 7.19 at rest to 7.17 (Gatten, 1975). Thus, these turtles can easily tolerate the variability of arterial  $P_{O_2}$  values observed in this study.

#### Large lung $O_2$ store

Finally, if an increase in arterial  $P_{O_2}$  is required, turtles can access the  $O_2$  stored in the lungs. The turtle lung provides a large  $O_2$  reservoir, accounting for over two-thirds of the total body  $O_2$  store. Because gas exchange is not cut off in the shallow diving freshwater turtle, pulmonary and systemic blood flow can be increased or decreased during dives (Krosniunas and Hicks, 2003) to elevate arterial  $P_{O_2}$  without the turtle having to surface. The increases in arterial  $P_{O_2}$  observed during some submergences suggest this is occurring (see e.g. Fig. 5). Further, distinct lung and arterial  $O_2$  profiles demonstrate that turtles may deplete the lung  $O_2$  store in a non-uniform, intermittent manner through changes in cardiac shunting patterns during submergences (Burggren and Shelton, 1979).

The combination of the present results, freshwater turtles' low  $O_2$  requirements, their high tolerance to anoxia and their ability to access lung  $O_2$  during submergences suggest that these turtles do not need to tightly regulate arterial  $O_2$  levels.

#### Tight regulation of $O_2$ – a disadvantage?

In turtles at a relatively constant body temperature, maintaining a high arterial  $P_{O_2}$  requires minimizing R–L cardiac shunting. However, precise regulation of cardiac shunting to maintain high blood  $O_2$  levels may not be possible for freshwater turtles under all physiological states. For instance, during digestion or activity, the regulation of blood flow to various tissues and organs may influence the hemodynamic state, and the associated changes in cardiac shunting patterns and effects on blood  $O_2$  levels are simply the passive consequences of these adjustments (Hicks, 2002). Alternatively, if blood  $O_2$  levels needed to be tightly regulated, the lack of separation in the ventricle would mean regulation of vascular beds would be constrained by the effect on cardiac shunting, limiting the ability of the autonomic nervous system to respond to changing conditions. For example, peripheral vasodilation occurs during basking, resulting in the development of a large R–L shunt (Galli et al., 2004). Because a R–L shunt will lower arterial  $P_{O_2}$ , if arterial  $O_2$  levels were tightly regulated, the ability of turtles to thermoregulate during basking would be constrained.

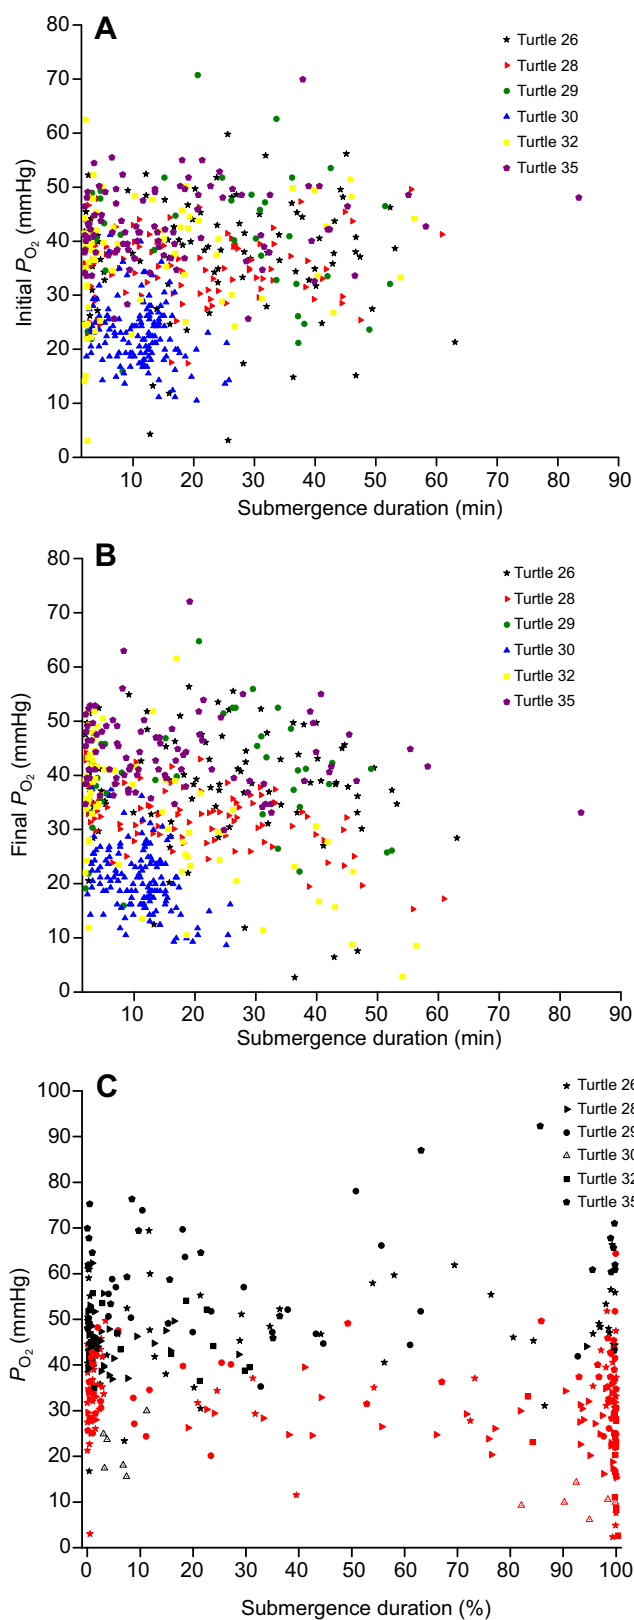

**Fig. 4. Arterial  $P_{O_2}$  and submergence duration.** (A) Initial  $P_{O_2}$  versus submergence duration and (B) final  $P_{O_2}$  versus submergence duration. Number of submergences=529. (C) Maximum (black symbols) and minimum (red symbols)  $P_{O_2}$  versus percent of submergence duration in submergences longer than 20 min. Note the concentration of maximum and minimum  $P_{O_2}$  values at the beginning or ending portion of submergences. Number of submergences=168.

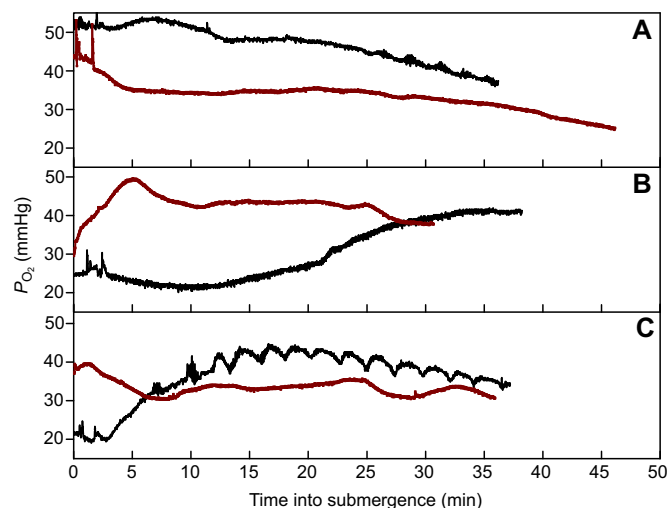

**Fig. 5. Arterial  $P_{O_2}$  profiles in long submergences in two turtles.**  $P_{O_2}$  profiles varied among submergences with  $P_{O_2}$  decreasing (A), increasing (B) and fluctuating up and down (C). Red profiles, turtle 28; black profiles, turtle 29.

#### Arterial $P_{O_2}$ is not high during basking, at the surface or at the start of submergences

Arterial  $P_{O_2}$  values were not elevated when turtles were basking, at the surface or at the beginning of submergences (Tables 1 and 2). We had predicted that arterial  $P_{O_2}$  would be high at the surface because past studies found a reduction or reversal of R–L shunts during ventilatory periods. Further, because red-eared sliders immediately dive below the water's surface if disturbed,

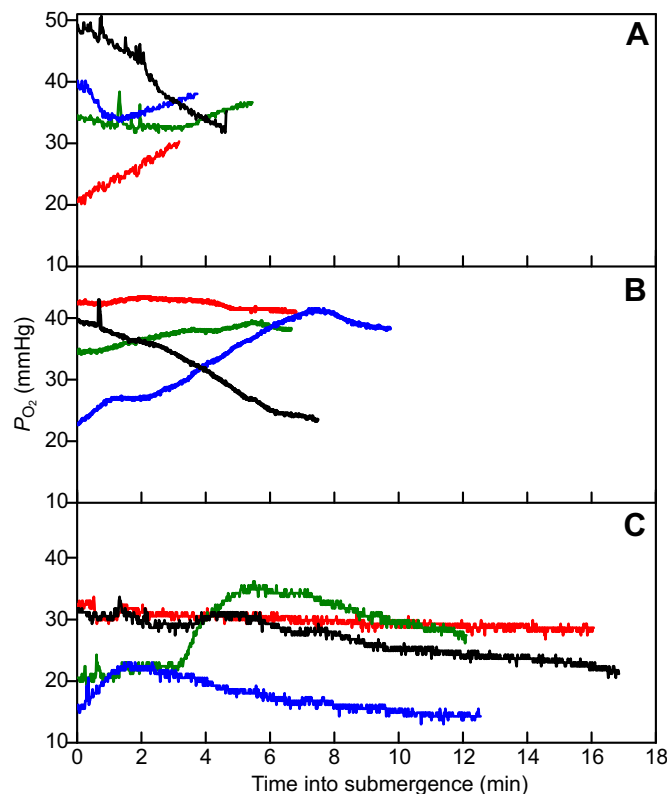

**Fig. 6. Arterial  $P_{O_2}$  profiles in submergences of different durations.** (A) Submergences of 2–6 min from turtle 29, (B) submergences of 6–11 min from turtle 32 and (C) submergences of 12–18 min from turtle 30.

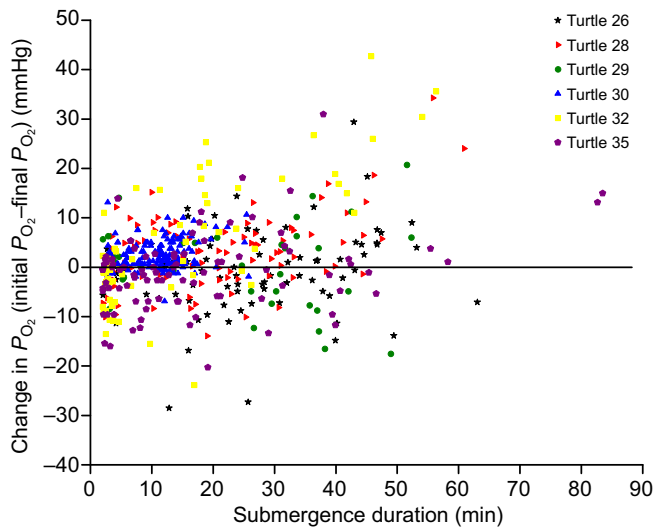

**Fig. 7. Change in  $P_{O_2}$  from beginning to end of submergence versus submergence duration.** Negative values indicate  $P_{O_2}$  at the end of a submergence was higher than initial  $P_{O_2}$ . Number of submergences=529.

maintenance of high arterial  $P_{O_2}$  values when they are out of the water or at the surface might therefore be beneficial. However, turtles typically began submergences near 37 mmHg (or at approximately 74% Hb saturation) and mean  $P_{O_2}$  values ranged from 23 to 54 mmHg (54% to 83% Hb saturation) when turtles were resting at the surface or basking. These values are lower than those found in past studies on both anesthetized and voluntarily diving turtles, where values ranged from 55 to 119 mmHg (Burggren and Shelton, 1979; Burggren et al., 1989; Crossley et al., 1998; Hicks and Wang, 1999; Platzack and Hicks, 2001), and suggest that R–L shunts continue to play a significant role during all ventilatory periods in undisturbed turtles. In short, *T. scripta* do not appear to anticipate or prepare for submergences by increasing initial  $P_{O_2}$  before a submergence (Table 1, Fig. 4A), and consistently begin submergences well below 90% Hb saturation.

#### No typical $P_{O_2}$ pattern during submergences

Surprisingly, there were no typical arterial  $P_{O_2}$  patterns during submergences. Air-breathing animals must rely on the  $O_2$  stored within the body during submergences, and there is a clear decrease in overall  $O_2$  levels as the animal remains underwater. This reduction in  $O_2$  is apparent in blood  $O_2$  profiles of freely diving mammals and birds (McDonald and Ponganis, 2013; Meir et al., 2009; Ponganis et al., 2009, 2007). In contrast to our predictions, final arterial  $P_{O_2}$  values in the present study were not strongly related to submergence duration. Further, although some variation in arterial  $P_{O_2}$  values was predicted, the lack of typical arterial  $P_{O_2}$  profiles during submergences was not anticipated. In particular, the lack of a consistent decline in  $P_{O_2}$  during submergences was unexpected.

#### Final arterial $P_{O_2}$ values and submergence duration

Final values for dives varied widely (3 to 72 mmHg; Table 2). Despite this variation, our prediction that final arterial  $P_{O_2}$  values would be related to dive duration was statistically correct in submergences of >2 min ( $P < 0.001$ ). However, with a marginal  $r^2$  value of 0.07, the usefulness of this result to predict final  $P_{O_2}$  values is negligible (Table S1). We also predicted that this relationship would be stronger in longer dives. However, in submergences longer than 20 min, the marginal  $r^2$  value for the best fit model was

even lower (0.06). A visual examination of Fig. 4B showing final  $P_{O_2}$  and duration for all submergences also does not suggest a strong relationship. Further, there was very little difference between the grand mean final  $P_{O_2}$  (35 mmHg) and the grand mean initial  $P_{O_2}$  (37 mmHg) (Table 1). Rather, the more consequential interpretation of the statistical results is in the strong role that the individual turtle played in the relationship. A comparison of the marginal  $r^2$  and conditional  $r^2$  values demonstrates that, rather than the effect of duration, the strong influence of individual turtle effects explained much of the variation in the relationship between final  $P_{O_2}$  and duration. In fact, conditional  $r^2$  values were high for most models (Table S1), emphasizing the high variability between individual turtles. Thus, these data and results do not suggest a biologically significant relationship between final or minimum  $P_{O_2}$  and dive duration; rather, they emphasize the high level of variation among and within individuals.

#### Arterial $P_{O_2}$ profiles during submergences

In all turtles, arterial  $P_{O_2}$  profiles demonstrated increases, decreases, and both increases and decreases during submergences (Figs 1 and 2), but there was no typical  $P_{O_2}$  profile for any individual turtle or duration. These profiles are in contrast to the only other studies continuously measuring arterial  $P_{O_2}$  in undisturbed air-breathing animals (McDonald and Ponganis, 2012; Meir et al., 2009; Ponganis et al., 2009). In the diving emperor penguin, after an initial increase in air sac  $P_{O_2}$  owing to compression hyperoxia, air sac  $P_{O_2}$  declines throughout the dive, demonstrating maintenance of gas exchange with the lungs during dives. Arterial  $P_{O_2}$  also follows a primarily monotonic decline after an initial increase (Ponganis et al., 2009). Similar patterns were observed in the elephant seal and California sea lion, except gas exchange with the lungs ceases at some point during their dives (McDonald and Ponganis, 2012; Meir et al., 2009). Patterns with similar monotonic declines were observed in the turtles, but not consistently (Figs 5 and 6). There were also  $P_{O_2}$  profiles that followed an opposite pattern, increasing throughout submergences over 20 min in duration (Fig. 5). No such variation has been observed in arterial  $P_{O_2}$  profiles of penguins or pinnipeds.

The observed variation in arterial  $P_{O_2}$  profiles reinforces the biological significance of the physiological and anatomical differences between turtles and mammals and birds. Because mammals and birds have separated right and left ventricles in the heart, to the extent gas exchange is maintained during submergences (throughout dives for emperor penguins and for the initial and end portions of dives for pinnipeds), arterial blood gas profiles will closely reflect lung gas tensions (Ponganis et al., 2010, 2009). In contrast, arterial  $P_{O_2}$  values in freshwater turtles will also reflect the magnitude and direction of cardiac shunting. Further, as discussed above, turtles, with their low  $O_2$  requirements, high buffering capacity and anoxia tolerance, do not need to maintain high, stable blood  $O_2$  levels.

#### Prior studies

Our results are also inconsistent with earlier laboratory studies on freshwater turtles using serial sampling or extracorporeal catheter loops (Burggren and Shelton, 1979; Burggren et al., 1989; White et al., 1989). In these studies, arterial  $P_{O_2}$  primarily followed a pattern of steady decline over the course of voluntary diving or breath holds (Burggren and Shelton, 1979; Burggren et al., 1989; White et al., 1989). Deviations from this general pattern have been observed, including arterial  $P_{O_2}$  oscillations (increases and decreases) within submergences of *T. scripta* (Burggren and



Shelton, 1979). However, in that study, an overall decline in  $P_{O_2}$  was observed by the end of submergences (Burggren and Shelton, 1979). In *C. longicollis*, arterial  $P_{O_2}$  oscillated up and down, but remained generally constant ('arterial homeostasis') throughout submergences (Burggren et al., 1989). In both studies, these patterns occurred only in a minority of submergences, with most of the submergences following the pattern of steady  $P_{O_2}$  decline (Burggren and Shelton, 1979; Burggren et al., 1989). In addition, arterial  $P_{O_2}$  values in earlier studies were generally higher than observed in the present study during submergences (Burggren and Shelton, 1979; Burggren et al., 1989; Crossley et al., 1998; Hicks and Wang, 1999; Platzack and Hicks, 2001).

There are several reasons why our results, showing no consistent arterial  $P_{O_2}$  pattern and lower arterial  $P_{O_2}$  values, may differ from these earlier studies. It is possible that our results differ because the recorder attached to the carapace placed a burden on the turtles that affected  $O_2$  transport in a way that altered arterial  $O_2$  levels. However, we believe this is unlikely because the recorder weighed less than 30 g in water, the behavior of turtles was similar to behavior prior to instrumentation, and turtles can adjust buoyancy to accommodate additional weight (Jackson, 1969). Rather, the level of disturbance to turtles in past experiments may account for the different results.

Past experiments measured blood  $O_2$  levels using serial blood sampling and/or some level of manipulation or impediment to movement, including turtles constrained in small tanks with a small breathing hole (Burggren and Shelton, 1979; Burggren et al., 1989; Glass et al., 1983; Jackson, 1973; White et al., 1989) or turtles tethered to external devices, such as catheters (Burggren and Shelton, 1979; Burggren et al., 1989; Glass et al., 1983; Krosniunas and Hicks, 2003; White et al., 1989). These types of disturbances have been shown to affect the behavior and physiology of reptiles and birds (Gaunt and Gans, 1969; de Villiers et al., 2006; Wright et al., 1992). Similarly, results from early laboratory studies on physiological responses of forcibly submerged marine mammals and birds were not consistently reproduced in freely diving animals (Jobsis et al., 2001). Thus, a primary goal of this study was to understand arterial  $O_2$  levels with minimal disturbance to the turtles. Although a  $P_{O_2}$  electrode was implanted and turtles had a recorder on their carapace, the system was self-contained and turtles were otherwise undisturbed. Investigators and others were only in the room for brief periods of time during the 48-h period. Experiments were conducted in the same room and tanks the turtles had acclimated to for the previous 4 weeks. Turtles were able to move freely without restraints and had unfettered access to the surface in these large tanks. Thus, the results in the present study may differ owing to the diminished potential for disturbances confounding physiological responses.

Finally, prior studies, using serial or continuous blood sampling, could not produce the comprehensive  $P_{O_2}$  profiles obtained here. We measured  $P_{O_2}$  in 529 submergences over a continuous 48-h period in six turtles. The many variations in arterial  $P_{O_2}$  profiles observed in the present study included the steady decline, arterial homeostasis and arterial oscillations profiles observed in past studies (Figs 5 and 6). Further, the high sampling rate allowed for a more complete picture of each profile that intermittent blood sampling could easily miss. Thus, with the ability to collect  $P_{O_2}$  data at 1 Hz for days, additional  $P_{O_2}$  profiles were revealed that were not clearly observed in past studies and the lack of a typical profile was more apparent. Ultimately, this study provides a more complete picture of arterial  $P_{O_2}$  profiles than has been observed in past studies.

## Conclusions

This first study of arterial  $P_{O_2}$  in untethered, undisturbed, freely swimming aquatic turtles has revealed significant differences from past studies of *T. scripta*. Undisturbed, freely diving turtles do not maintain high or stable arterial  $P_{O_2}$ , but rather exhibit extreme variation in arterial  $P_{O_2}$  across routine activities. Overall, arterial  $P_{O_2}$  is also lower during all activities than in previous studies and is not elevated during ventilatory periods. Changes in cardiac shunting patterns likely account for the variation in  $P_{O_2}$  profiles and lower values. However, the lack of relationship between  $P_{O_2}$  and any activity suggests that cardiac shunts are not regulated to maintain specific arterial  $P_{O_2}$  values. Rather, these data support the hypothesis that cardiac shunting is the passive by-product of the factors that alter pulmonary and systemic vascular resistances.

Future work should investigate whether arterial  $P_{O_2}$  values are similarly low and variable in other chelonian species, including turtles from different habitats, such as tortoises or marine turtles. Diving marine turtles may have different  $O_2$  transport requirements because lung collapse at depth cuts off gas exchange, making the lung  $O_2$  store inaccessible during deep dives.

Finally, the value of chronically implanted  $P_{O_2}$  microelectrodes is also demonstrated in this study. Although arterial  $P_{O_2}$  had been studied in freshwater turtles using traditional intermittent blood sampling methods, the patterns and values under different activities were not apparent. Using the implanted  $P_{O_2}$  microelectrode and self-contained data logger allowed the turtle to be completely isolated from investigator presence and not tethered to catheters or external equipment. This low level of disturbance allowed us to obtain arterial  $P_{O_2}$  measurements in a wide range of activities without being present. The next step will be to examine blood  $O_2$  levels in fully natural conditions by deploying the instruments on freshwater turtles residing in ponds or lakes. The miniaturization of electronics also means investigators can start making these types of measurements on smaller, terrestrial animals. With the use of self-contained physiological loggers, we can finally begin to fully understand the physiological ecology of these animals under natural conditions outside the laboratory.

## Acknowledgements

We thank D. Crossley for valuable assistance in obtaining the turtles. C. Cruz, D. Laset, K. Florimon, A. Hugh, J. Lee and R. Rana assisted with animal care and data collection. A. Jackson, C. Jew and C. Slay provided additional support. We also thank P. Ponganis, A. Hindle and three anonymous reviewers for helpful comments on the manuscript.

## Competing interests

The authors declare no competing or financial interests.

## Author contributions

C.L.W. and J.W.H. designed and performed the study, C.L.W. analyzed the data, and C.L.W. and J.W.H. prepared the manuscript.

## Funding

This research was funded by the National Science Foundation (IOS-1121324 to J.W.H.). C.L.W. was supported by a National Institutes of Health training grant (2T32AR047752 to V. J. Caiozzo). Deposited in PMC for release after 12 months.

## Supplementary information

Supplementary information available online at <http://jeb.biologists.org/lookup/doi/10.1242/jeb.141010.supplemental>

## References

- Bates, D., Mächler, M., Bolker, B. and Walker, S. (2015). Fitting linear mixed-effects models using lme4. *J. Stat. Softw.* **67**, 1–48.
- Belkin, D. A. (1968). Aquatic respiration and underwater survival of two freshwater turtle species. *Respir. Physiol.* **4**, 1–14.

- Burggren, W. and Shelton, G. (1979). Gas exchange and transport during intermittent breathing in chelonian reptiles. *J. Exp. Biol.* **82**, 75–92.
- Burggren, W., Hahn, C. E. W. and Foëx, P. (1977). Properties of blood oxygen transport in the turtle *Pseudemys scripta* and the tortoise *Testudo graeca*: effects of temperature, CO<sub>2</sub> and pH. *Respir. Physiol.* **31**, 39–50.
- Burggren, W., Smits, A. and Evans, B. (1989). Arterial O<sub>2</sub> homeostasis during diving in the turtle *Chelodina longicollis*. *Physiol. Zool.* **62**, 668–686.
- Butler, P. J. and Jones, D. R. (1997). The physiology of diving of birds and mammals. *Physiol. Rev.* **77**, 837–899.
- Crossley, D., Altimiras, J. and Wang, T. (1998). Hypoxia elicits an increase in pulmonary vasculature resistance in anaesthetised turtles (*Trachemys scripta*). *J. Exp. Biol.* **201**, 3367–3375.
- de Villiers, M., Bause, M., Giese, M. and Fourie, A. (2006). Hardly hard-hearted: heart rate responses of incubating northern giant petrels (*Macronectes halli*) to human disturbance on sub-Antarctic Marion Island. *Polar Biol.* **29**, 717–720.
- Dempsey, J. A., Hanson, P. G. and Henderson, K. S. (1984). Exercise-induced arterial hypoxaemia in healthy human subjects at sea level. *J. Physiol.* **355**, 161–175.
- Galli, G., Taylor, E. W. and Wang, T. (2004). The cardiovascular responses of the freshwater turtle *Trachemys scripta* to warming and cooling. *J. Exp. Biol.* **207**, 1471–1478.
- Gatten, R. E. (1975). Effects of activity on blood oxygen saturation, lactate, and pH in the turtles *Pseudemys scripta* and *Terrapene ornata*. *Physiol. Zool.* **48**, 24–35.
- Gaunt, A. S. and Gans, C. (1969). Diving bradycardia and withdrawal bradycardia in *Caiman crocodilus*. *Nature* **223**, 207–208.
- Glass, M., Boutillier, R. and Heisler, N. (1983). Ventilatory control of arterial P<sub>O<sub>2</sub></sub> in the turtle *Chrysemys picta bellii*: effects of temperature and hypoxia. *J. Comp. Physiol. A Neuroethol. Sens. Neural Behav. Physiol.* **151**, 145–153.
- Hicks, J. W. (1994). Adrenergic and cholinergic regulation of intracardiac shunting. *Physiol. Zool.* **67**, 1325–1346.
- Hicks, J. W. (2002). The physiological and evolutionary significance of cardiovascular shunting patterns in reptiles. *News Physiol. Sci.* **17**, 241–245.
- Hicks, J. W. and Comeau, S. G. (1994). Vagal regulation of intracardiac shunting in the turtle *Pseudemys scripta*. *J. Exp. Biol.* **186**, 109–126.
- Hicks, J. W. and Wang, T. (1996). Functional role of cardiac shunts in reptiles. *J. Exp. Zool.* **275**, 204–216.
- Hicks, J. W. and Wang, T. (1998). Cardiovascular regulation during anoxia in the turtle: an *in vivo* study. *Physiol. Zool.* **71**, 1–14.
- Hicks, J. W. and Wang, T. (1999). Hypoxic hypometabolism in the anesthetized turtle, *Trachemys scripta*. *Am. J. Physiol. Regul. Integr. Comp. Physiol.* **277**, R18–R23.
- Hicks, J. W. and Wang, T. (2004). Hypometabolism in reptiles: behavioural and physiological mechanisms that reduce aerobic demands. *Respir. Physiol. Neurobiol.* **141**, 261–271.
- Jackson, D. C. (1969). Buoyancy control in the freshwater turtle, *Pseudemys scripta elegans*. *Science* **166**, 1649–1651.
- Jackson, D. C. (1973). Ventilatory response to hypoxia in turtles at various temperatures. *Respir. Physiol.* **18**, 178–187.
- Knower Stockard, T., Heil, J., Meir, J. U., Sato, K., Ponganis, K. V. and Ponganis, P. J. (2005). Air sac P<sub>O<sub>2</sub></sub> and oxygen depletion during dives of emperor penguins. *J. Exp. Biol.* **208**, 2973–2980.
- Jobsis, P. D., Ponganis, P. J. and Kooyman, G. L. (2001). Effects of training on forced submersion responses in harbor seals. *J. Exp. Biol.* **204**, 3877–3885.
- Johnson, P. C. D. (2014). Extension of Nakagawa & Schielzeth's R<sup>2</sup>GLMM to random slopes models. *Methods Ecol. Evol.* **5**, 944–946.
- Kooyman, G. L. and Ponganis, P. J. (1998). The physiological basis of diving to depth: birds and mammals. *Annu. Rev. Physiol.* **60**, 19–32.
- Kooyman, G. L., Wahrenbrock, E. A., Castellini, M. A., Davis, R. W. and Sinnett, E. E. (1980). Aerobic and anaerobic metabolism during voluntary diving in Weddell seals: evidence of preferred pathways from blood chemistry and behavior. *J. Comp. Physiol. B Biochem. Syst. Environ. Physiol.* **138**, 335–346.
- Krosniunas, E. H. and Hicks, J. W. (2003). Cardiac output and shunt during voluntary activity at different temperatures in the turtle, *Trachemys scripta*. *Physiol. Biochem. Zool.* **76**, 679–694.
- McDonald, B. I. and Ponganis, P. J. (2012). Lung collapse in the diving sea lion: hold the nitrogen and save the oxygen. *Biol. Lett.* **8**, 1047–1049.
- McDonald, B. I. and Ponganis, P. J. (2013). Insights from venous oxygen profiles: oxygen utilization and management in diving California sea lions. *J. Exp. Biol.* **216**, 3332–3341.
- Meir, J. U., Champagne, C. D., Costa, D. P., Williams, C. L. and Ponganis, P. J. (2009). Extreme hypoxemic tolerance and blood oxygen depletion in diving elephant seals. *Am. J. Physiol. Regul. Integr. Comp. Physiol.* **297**, R927–R939.
- Nakagawa, S. and Schielzeth, H. (2013). A general and simple method for obtaining R<sup>2</sup> from generalized linear mixed-effects models. *Methods Ecol. Evol.* **4**, 133–142.
- O'Rourke, D. P. and Jenkins, A. L. (2008). *Anesthesia and Analgesia in Laboratory Animals*. London, UK: Academic Press.
- Platzack, B. R. and Hicks, J. W. (2001). Reductions in systemic oxygen delivery induce a hypometabolic state in the turtle *Trachemys scripta*. *Am. J. Physiol. Regul. Integr. Comp. Physiol.* **281**, R1295–R1301.
- Ponganis, P. J., Stockard, T. K., Meir, J. U., Williams, C. L., Ponganis, K. V., van Dam, R. P. and Howard, R. (2007). Returning on empty: extreme blood O<sub>2</sub> depletion underlies dive capacity of emperor penguins. *J. Exp. Biol.* **210**, 4279–4285.
- Ponganis, P. J., Stockard, T. K., Meir, J. U., Williams, C. L., Ponganis, K. V. and Howard, R. (2009). O<sub>2</sub> store management in diving emperor penguins. *J. Exp. Biol.* **212**, 217–224.
- Ponganis, P. J., Meir, J. U. and Williams, C. L. (2010). Oxygen store depletion and the aerobic dive limit in emperor penguins. *Aquat. Biol.* **8**, 237–245.
- Ponganis, P. J., Meir, J. U. and Williams, C. L. (2011). In pursuit of Irving and Scholander: a review of oxygen store management in seals and penguins. *J. Exp. Biol.* **214**, 3325–3339.
- Qvist, J., Hill, R. D., Schneider, R. C., Falke, K. J., Liggins, G. C., Guppy, M., Elliott, R. L., Hochachka, P. W. and Zapol, W. M. (1986). Hemoglobin concentrations and blood gas tensions of free-diving Weddell seals. *J. Appl. Physiol.* **61**, 1560–1569.
- Shelton, G. and Burggren, W. (1976). Cardiovascular dynamics of the chelonian during apnoea and lung ventilation. *J. Exp. Biol.* **64**, 323–343.
- Taylor, C. R., Karas, R. H., Weibel, E. R. and Hoppeler, H. (1987). Adaptive variation in the mammalian respiratory system in relation to energetic demand: II. Reaching the limits to oxygen flow. *Respir. Physiol.* **69**, 7–26.
- Wang, T. and Hicks, J. W. (1996a). Cardiorespiratory synchrony in turtles. *J. Exp. Biol.* **199**, 1791–1800.
- Wang, T. and Hicks, J. W. (1996b). The interaction of pulmonary ventilation and the right-left shunt on arterial oxygen levels. *J. Exp. Biol.* **199**, 2121–2129.
- Wang, T. and Hicks, J. W. (2008). Changes in pulmonary blood flow do not affect gas exchange during intermittent ventilation in resting turtles. *J. Exp. Biol.* **211**, 3759–3763.
- Wang, T., Krosniunas, E. H. and Hicks, J. W. (1997). The role of cardiac shunts in the regulation of arterial blood gases. *Am. Zool.* **37**, 12–22.
- Warren, D. E. and Jackson, D. C. (2008). Lactate metabolism in anoxic turtles: an integrative review. *J. Comp. Physiol. B Biochem. Syst. Environ. Physiol.* **178**, 133–148.
- Warren, D. E., Reese, S. A. and Jackson, D. C. (2006). Tissue glycogen and extracellular buffering limit the survival of red-eared slider turtles during anoxic submergence at 3°C. *Physiol. Biochem. Zool.* **79**, 736–744.
- White, F. N. and Ross, G. (1966). Circulatory changes during experimental diving in the turtle. *Am. J. Physiol.* **211**, 15–18.
- White, F. N., Hicks, J. W. and Ishimatsu, A. (1989). Relationship between respiratory state and intracardiac shunts in turtles. *Am. J. Physiol.* **256**, R240–R247.
- Wright, J. C., Grigg, G. C. and Franklin, C. E. (1992). Redistribution of air within the lungs may potentiate 'fright' bradycardia in submerged crocodiles (*Crocodylus porosus*). *Comp. Biochem. Physiol. A Mol. Integr. Physiol.* **102**, 33–36.
